# Supplementary material for: Reversal of neuronal tau pathology, metabolic dysfunction, and electrophysiological defects via adiponectin pathway-dependent AMPK activation
Source: PubMed Central journal article supplement (PMC10871331; doi:10.1101/2024.02.07.579204), 2024-02-07

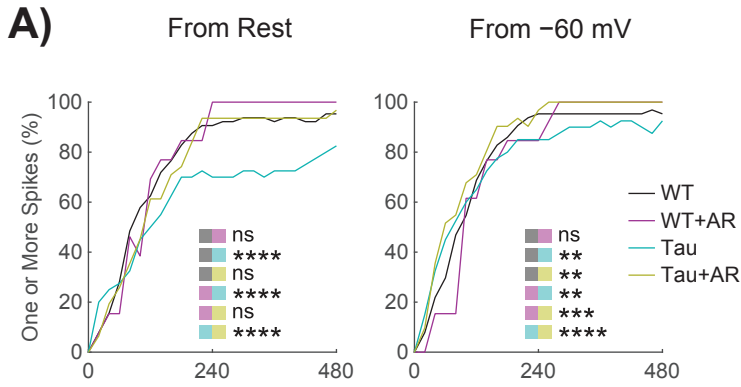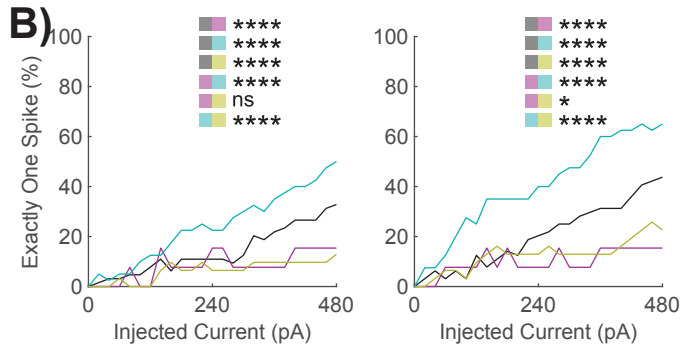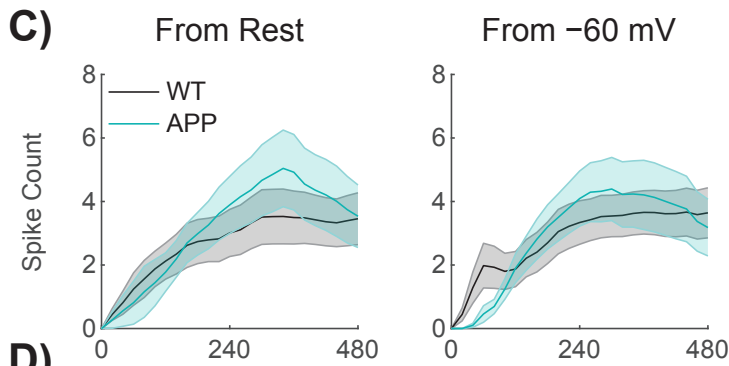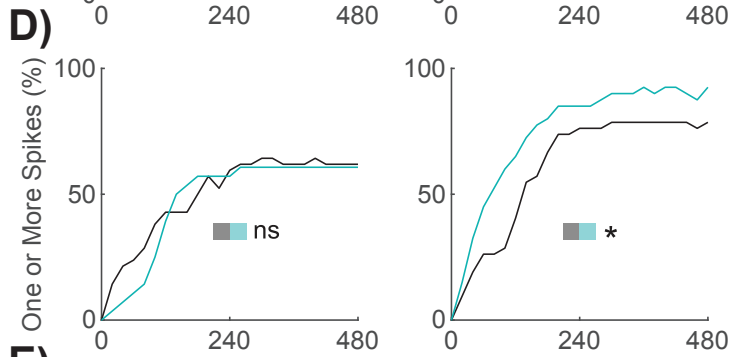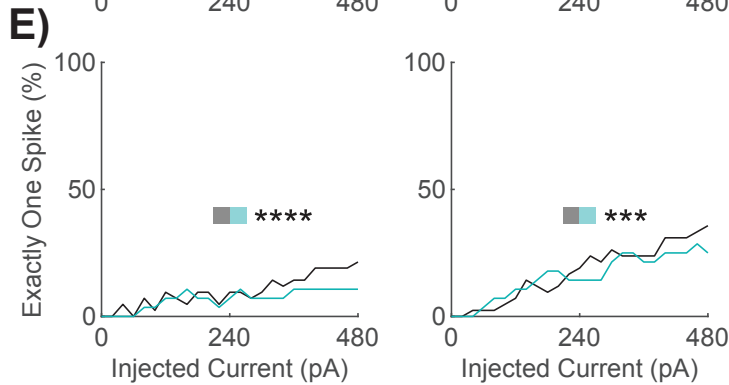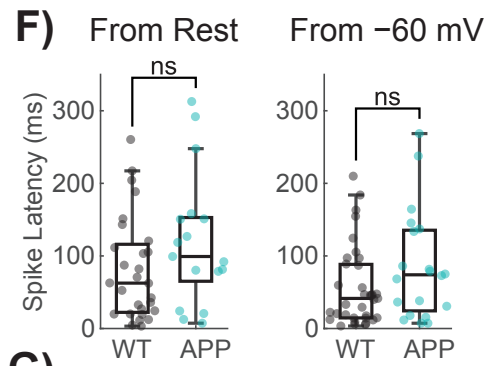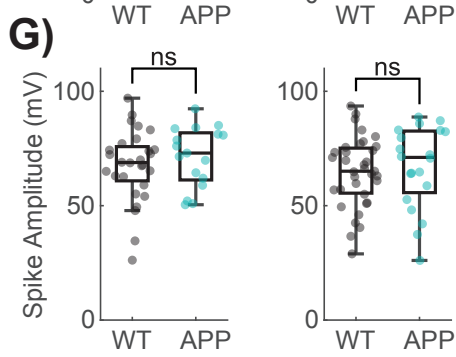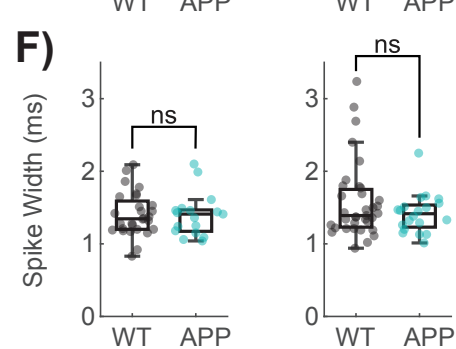

Supplement: media-6.pdf [file media-6.pdf]
